# Supplementary material for: Fluormacraeite, [(H2O)K]Mn2(Fe2Ti)(PO4)4[OF](H2O)10 ⋅ 4H2O, the first type mineral from the Plößberg pegmatite, Upper Palatinate, Bavaria, Germany
Source: Copernicus journal article supplement (doi:10.5194/ejm-37-169-2025), 2025-03-17

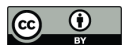

*Supplement of*

**Fluormacraeite,  $[(\text{H}_2\text{O})\text{K}]\text{Mn}_2(\text{Fe}_2\text{Ti})(\text{PO}_4)_4[\text{OF}](\text{H}_2\text{O})_{10} \cdot 4\text{H}_2\text{O}$ , the first type mineral from the Plößberg pegmatite, Upper Palatinate, Bavaria, Germany**

Ian E. Grey et al.

*Correspondence to:* Ian E. Grey ([ian.grey@csiro.au](mailto:ian.grey@csiro.au))

The copyright of individual parts of the supplement might differ from the article licence.

## checkCIF/PLATON report

You have not supplied any structure factors. As a result the full set of tests cannot be run.

THIS REPORT IS FOR GUIDANCE ONLY. IF USED AS PART OF A REVIEW PROCEDURE FOR PUBLICATION, IT SHOULD NOT REPLACE THE EXPERTISE OF AN EXPERIENCED CRYSTALLOGRAPHIC REFEREE.

No syntax errors found.      CIF dictionary      Interpreting this report

### Datablock: I

---

|                 |                              |                           |             |
|-----------------|------------------------------|---------------------------|-------------|
| Bond precision: | P- O = 0.0030 A              | Wavelength=0.71070        |             |
| Cell:           | a=10.546(2)                  | b=20.655(1)               | c=12.405(1) |
|                 | alpha=90                     | beta=90.09(1)             | gamma=90    |
| Temperature:    | 100 K                        |                           |             |
|                 | Calculated                   | Reported                  |             |
| Volume          | 2702.2(6)                    | 2702.1(6)                 |             |
| Space group     | P 21/c                       | P 1 21/c 1                |             |
| Hall group      | -P 2ybc                      | -P 2ycb                   |             |
| Moiety formula  | Fe10.71 H88 K0.53 Mn7.41     |                           |             |
|                 | O115.07 P16, 12(H2 O), 4(H ? |                           |             |
|                 | O), 0.824(O                  |                           |             |
| Sum formula     | Fe10.71 H116 K3.70 Mn7.41    | H29 O32.973 Mg0 P4 K0.927 |             |
|                 | O131.90 P16                  | Ti0 Mn1.853 Fe2.678       |             |
| Mr              | 3872.98                      | 968.30                    |             |
| Dx, g cm-3      | 2.380                        | 2.380                     |             |
| Z               | 1                            | 4                         |             |
| Mu (mm-1)       | 2.760                        | 2.760                     |             |
| F000            | 1945.3                       | 1945.0                    |             |
| F000'           | 1955.11                      |                           |             |
| h, k, lmax      | 15, 31, 18                   | 14, 28, 18                |             |
| Nref            | 9568                         | 6313                      |             |
| Tmin, Tmax      | 0.871, 0.921                 | 0.570, 0.750              |             |
| Tmin'           | 0.871                        |                           |             |

Correction method= # Reported T Limits: Tmin=0.570 Tmax=0.750  
AbsCorr = MULTI-SCAN

Data completeness= 0.660

Theta(max)= 32.240

R(reflections)= 0.0559( 5646)

wR2(reflections)=

wR= 0.0710( 6313)

S = 2.430

Npar= 488

---

The following ALERTS were generated. Each ALERT has the format

**test-name\_ALERT\_alert-type\_alert-level.**

Click on the hyperlinks for more details of the test.

---

### Alert level A

PLAT027\_ALERT\_3\_A \_diffn\_reflns\_theta\_full value (too) Low ..... 22.42 Degree

---

### Alert level B

PLAT112\_ALERT\_2\_B ADDSYM Detects New (Pseudo) Symm. Elem a 100 %Fit  
PLAT112\_ALERT\_2\_B ADDSYM Detects New (Pseudo) Symm. Elem b 100 %Fit  
PLAT113\_ALERT\_2\_B ADDSYM Suggests Possible Pseudo/New Space Group Pbca Check  
WARNING: Disordered Atoms Excluded from Analysis  
Check Model Parameter Symmetry for Reflection Data Support  
PLAT417\_ALERT\_2\_B Short Inter D-H..H-D H12A1 ..H14A1 . 1.87 Ang.  
x,y,z = 1\_555 Check  
PLAT420\_ALERT\_2\_B D-H Bond Without Acceptor O12B --H12B2 . Please Check  
PLAT420\_ALERT\_2\_B D-H Bond Without Acceptor O15A --H15A1 . Please Check

---

### Alert level C

ABSTY02\_ALERT\_1\_C An \_exptl\_absorpt\_correction\_type has been given without  
a literature citation. This should be contained in the  
\_exptl\_absorpt\_process\_details field.  
Absorption correction given as multi-scan  
GOODF01\_ALERT\_2\_C The least squares goodness of fit parameter lies  
outside the range 0.80 <> 2.00  
Goodness of fit given = 2.430  
PLAT041\_ALERT\_1\_C Calc. and Reported SumFormula Strings Differ Please Check  
Calc: Fe2.68 H29 K0.93 Mn1.85 O32.97 P4  
Rep.: H29 O32.973 Mg0 P4 K0.927 Ti0 Mn1.853 Fe2.678  
PLAT077\_ALERT\_4\_C Unitcell Contains Non-integer Number of Atoms .. Please Check  
PLAT127\_ALERT\_1\_C Implicit Hall Symbol Inconsistent with Explicit -P 2ycb Check  
PLAT250\_ALERT\_2\_C Large U3/U1 Ratio for <U(i,j)> Tensor(Resd 1) 2.2 Note

---

### Alert level G

ABSMU01\_ALERT\_1\_G Calculation of \_exptl\_absorpt\_correction\_mu  
not performed for this radiation type.  
CELLZ01\_ALERT\_1\_G Difference between formula and atom\_site contents detected.  
CELLZ01\_ALERT\_1\_G ALERT: Large difference may be due to a  
symmetry error - see SYMMG tests  
From the CIF: \_cell\_formula\_units\_Z 4  
From the CIF: \_chemical\_formula\_sum H29 O32.973 Mg0 P4 K0.927 Ti0 Mn1.  
TEST: Compare cell contents of formula and atom\_site data

| atom | Z*formula | cif sites | diff  |
|------|-----------|-----------|-------|
| H    | 116.00    | 116.00    | 0.00  |
| O    | 131.89    | 131.90    | -0.00 |

|    |       |       |      |
|----|-------|-------|------|
| Mg | 4.00  | 0.00  | 4.00 |
| P  | 16.00 | 16.00 | 0.00 |
| K  | 3.71  | 3.70  | 0.00 |
| Ti | 4.00  | 0.00  | 4.00 |
| Mn | 7.41  | 7.41  | 0.00 |
| Fe | 10.71 | 10.71 | 0.00 |

|                   |                                                  |                    |            |       |       |       |       |       |
|-------------------|--------------------------------------------------|--------------------|------------|-------|-------|-------|-------|-------|
| PLAT004_ALERT_5_G | Polymeric Structure Found with Maximum Dimension | 3                  | Info       |       |       |       |       |       |
| PLAT005_ALERT_5_G | No Embedded Refinement Details Found in the CIF  | Please Do !        |            |       |       |       |       |       |
| PLAT017_ALERT_1_G | Check Scattering Type Consistency of M1A         | as                 | MN         |       |       |       |       |       |
| PLAT017_ALERT_1_G | Check Scattering Type Consistency of M1B         | as                 | MN         |       |       |       |       |       |
| PLAT017_ALERT_1_G | Check Scattering Type Consistency of M2A         | as                 | FE         |       |       |       |       |       |
| PLAT017_ALERT_1_G | Check Scattering Type Consistency of M2B         | as                 | FE         |       |       |       |       |       |
| PLAT017_ALERT_1_G | Check Scattering Type Consistency of M3A         | as                 | FE         |       |       |       |       |       |
| PLAT017_ALERT_1_G | Check Scattering Type Consistency of M3B         | as                 | FE         |       |       |       |       |       |
| PLAT017_ALERT_1_G | Check Scattering Type Consistency of A1          | as                 | K          |       |       |       |       |       |
| PLAT017_ALERT_1_G | Check Scattering Type Consistency of A2          | as                 | K          |       |       |       |       |       |
| PLAT017_ALERT_1_G | Check Scattering Type Consistency of X1          | as                 | O          |       |       |       |       |       |
| PLAT017_ALERT_1_G | Check Scattering Type Consistency of X2          | as                 | O          |       |       |       |       |       |
| PLAT045_ALERT_1_G | Calculated and Reported Z Differ by a Factor ... | 0.250              | Check      |       |       |       |       |       |
| PLAT068_ALERT_1_G | Reported F000 Differs from Calcd (or Missing)... | Please Check       |            |       |       |       |       |       |
| PLAT112_ALERT_2_G | ADDSYM Detects New (Pseudo) Symm. Elem           | A                  | 88 %Fit    |       |       |       |       |       |
| PLAT301_ALERT_3_G | Main Residue Disorder .....                      | (Resd 1)           | 16% Note   |       |       |       |       |       |
| PLAT302_ALERT_4_G | Anion/Solvent/Minor-Residue Disorder (Resd       | 6)                 | 100% Note  |       |       |       |       |       |
| PLAT302_ALERT_4_G | Anion/Solvent/Minor-Residue Disorder (Resd       | 7)                 | 100% Note  |       |       |       |       |       |
| PLAT303_ALERT_2_G | Full Occupancy Atom H10A2                        | with # Connections | 1.13 Check |       |       |       |       |       |
| PLAT303_ALERT_2_G | Full Occupancy Atom H12B2                        | with # Connections | 1.13 Check |       |       |       |       |       |
| PLAT311_ALERT_2_G | Isolated Disordered Oxygen Atom (No H's ?) ..... |                    | Ow2 Check  |       |       |       |       |       |
| PLAT720_ALERT_4_G | Number of Unusual/Non-Standard Labels .....      |                    | 41 Note    |       |       |       |       |       |
|                   | M1A                                              | M1B                | M2A        | M2B   | M3A   | M3B   | A1    | A2    |
|                   | Ow1                                              | Ow2                | X1         | X2    | H9B1  | H11B1 | H11B2 | H12A1 |
|                   | H9B2                                             | H10A1              | H12B1      | H11A1 | H9A1  | Ha1A  | H10A2 | H9A2  |
|                   | H12B2                                            | H10B1              | H13B1      | H12A2 | H13A1 | H13B2 | H11A2 | H14A1 |
|                   | H15A1                                            | H15B1              | H14B1      | H15B2 | H10B2 | H14A2 | H14B2 | Ha1B  |
|                   | H13A2                                            |                    |            |       |       |       |       |       |
| PLAT808_ALERT_5_G | No Parseable SHELXL Style Weighting Scheme Found | Please Check       |            |       |       |       |       |       |
| PLAT860_ALERT_3_G | Number of Least-Squares Restraints .....         | 43                 | Note       |       |       |       |       |       |
| PLAT883_ALERT_1_G | No Info/Value for _atom_sites_solution_primary . | Please Do !        |            |       |       |       |       |       |
| PLAT951_ALERT_5_G | Calculated (ThMax) and CIF-Reported Kmax Differ  | 3                  | Units      |       |       |       |       |       |
| PLAT966_ALERT_5_G | Note: Non-Standard (i.e. 2.0) OMIT Threshold of  | 3.0                | Sig(I)     |       |       |       |       |       |

---

1 **ALERT level A** = Most likely a serious problem - resolve or explain  
6 **ALERT level B** = A potentially serious problem, consider carefully  
6 **ALERT level C** = Check. Ensure it is not caused by an omission or oversight  
30 **ALERT level G** = General information/check it is not something unexpected

19 ALERT type 1 CIF construction/syntax error, inconsistent or missing data  
12 ALERT type 2 Indicator that the structure model may be wrong or deficient  
3 ALERT type 3 Indicator that the structure quality may be low  
4 ALERT type 4 Improvement, methodology, query or suggestion  
5 ALERT type 5 Informative message, check

---

It is advisable to attempt to resolve as many as possible of the alerts in all categories. Often the minor alerts point to easily fixed oversights, errors and omissions in your CIF or refinement strategy, so attention to these fine details can be worthwhile. In order to resolve some of the more serious problems it may be necessary to carry out additional measurements or structure refinements. However, the purpose of your study may justify the reported deviations and the more serious of these should normally be commented upon in the discussion or experimental section of a paper or in the "special\_details" fields of the CIF. checkCIF was carefully designed to identify outliers and unusual parameters, but every test has its limitations and alerts that are not important in a particular case may appear. Conversely, the absence of alerts does not guarantee there are no aspects of the results needing attention. It is up to the individual to critically assess their own results and, if necessary, seek expert advice.

### **Publication of your CIF in IUCr journals**

A basic structural check has been run on your CIF. These basic checks will be run on all CIFs submitted for publication in IUCr journals (*Acta Crystallographica*, *Journal of Applied Crystallography*, *Journal of Synchrotron Radiation*); however, if you intend to submit to *Acta Crystallographica Section C* or *E* or *IUCrData*, you should make sure that full publication checks are run on the final version of your CIF prior to submission.

### **Publication of your CIF in other journals**

Please refer to the *Notes for Authors* of the relevant journal for any special instructions relating to CIF submission.

### **Validation response form**

Please find below a validation response form (VRF) that can be filled in and pasted into your CIF.

```
# start Validation Reply Form
_vrf_PLAT027_I
;
PROBLEM: _diffrn_reflns_theta_full value (too) Low .....      22.42 Degree
RESPONSE: ...
;
_vrf_PLAT112_I
;
PROBLEM: ADDSYM Detects New (Pseudo) Symm. Elem          a          100 %Fit
RESPONSE: ...
;
_vrf_PLAT113_I
;
PROBLEM: ADDSYM Suggests Possible Pseudo/New Space Group      Pbca Check
RESPONSE: ...
;
_vrf_PLAT417_I
;
PROBLEM: Short Inter D-H..H-D          H12A1      ..H14A1      .          1.87 Ang.
RESPONSE: ...
;
_vrf_PLAT420_I
```

;  
PROBLEM: D-H Bond Without Acceptor O12B --H12B2 . Please Check  
RESPONSE: ...  
;  
# end Validation Reply Form

**PLATON version of 13/05/2024; check.def file version of 04/05/2024**

Datablock I - ellipsoid plot

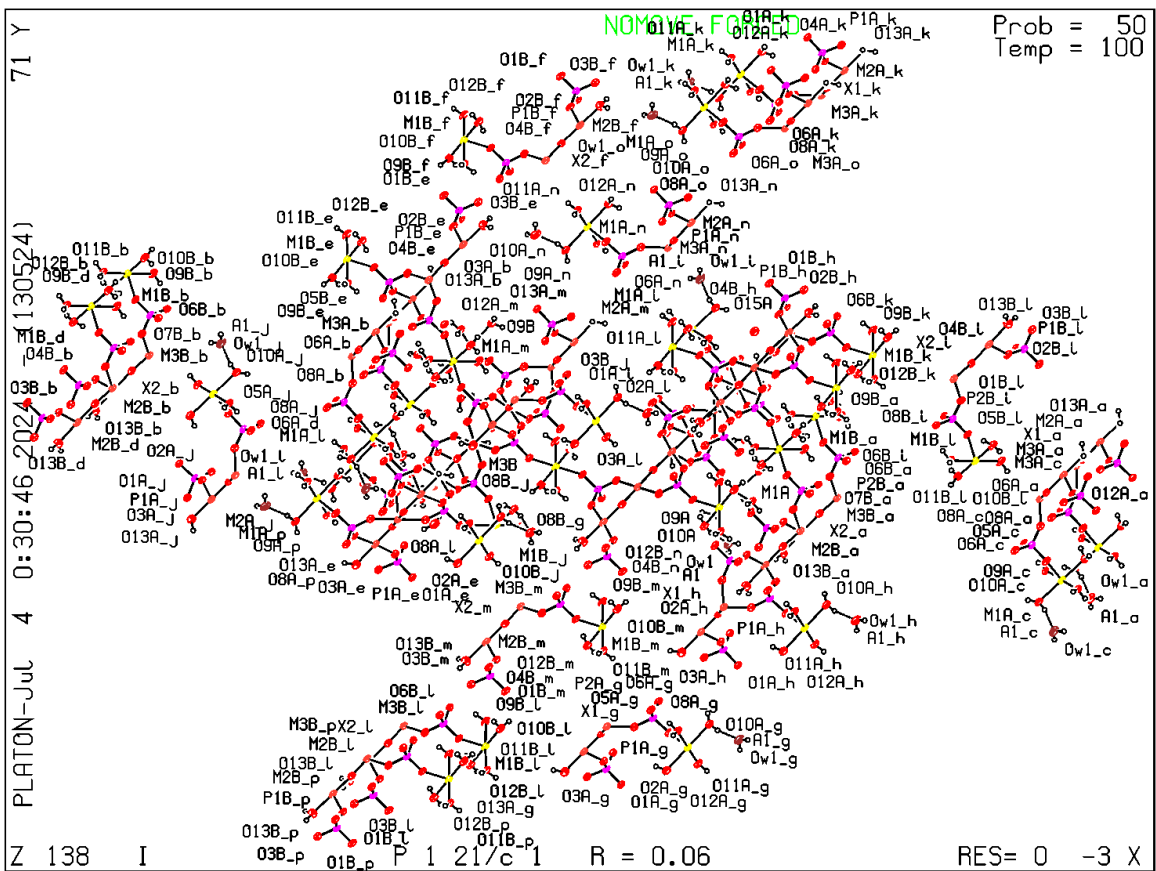

Supplement: Supplementary file 1 [file ejm-37-169-2025-supplement.pdf]
